# Supplementary material for: Hematite concave nanocubes and their superior catalytic activity for low temperature CO oxidation
Source: Royal Society of Chemistry journal article supplement (doi:10.1039/c4nr00552j), 2014-01-01
Supplement: c4nr00552j1.pdf [file c4nr00552j1.pdf]

Electronic Supplementary Information

### **Hematite concave nanocubes and their superior catalytic activity for low temperature CO oxidation**

Hanfeng Liang, Xinde Jiang, Zhengbin Qi, Wei Chen, Zhengtao Wu, Binbin Xu, Zhoucheng Wang,\*  
Jinxiao Mi, and Qingbiao Li

#### **Experimental section**

##### **Preparation**

*Synthesis of concave  $\alpha$ -Fe<sub>2</sub>O<sub>3</sub> nanocubes:* 2 mmol of Fe(NO<sub>3</sub>)<sub>3</sub>·9H<sub>2</sub>O and 1 mmol of copper acetate (CuOAc<sub>2</sub>·H<sub>2</sub>O) were dissolved in 10 mL of deionized water to form a homogeneous solution followed by ultrasonic treatment for 10 min. Then 10 mL of NH<sub>3</sub>·H<sub>2</sub>O (25 wt.%) was added into the solution. After irradiated by ultrasonic waves for another 5 min, the mixture was transferred into a Teflon-lined stainless steel autoclave of 50 mL capacity, sealed and maintained at 140 °C for 16 h. After the mixture was cooled to room temperature naturally, the obtained product was collected and washed several times with deionized water and ethanol, and finally dried at 60 °C for 12 h.

*Synthesis of porous  $\alpha$ -Fe<sub>2</sub>O<sub>3</sub> nanorods:*  $\beta$ -FeOOH nanorods precursors were first synthesized by a hydrothermal method.<sup>[1]</sup> 1 mmol of FeCl<sub>3</sub>·6H<sub>2</sub>O and 2 mmol of urea were dissolved in 20 mL of deionized water to form a homogeneous solution followed by ultrasonic treatment for 5 min. The solution was then transferred into a Teflon-lined stainless steel autoclave of 25 mL capacity. The autoclave was sealed and maintained at 120 °C for 10 h. After the mixture was cooled to room temperature naturally, the brown precipitation was collected and washed with deionized water, and finally dried at 60 °C for 12 h to obtain  $\beta$ -FeOOH nanorods. Porous  $\alpha$ -Fe<sub>2</sub>O<sub>3</sub> nanorods were obtained by calcining the  $\beta$ -FeOOH nanorods at 520 °C in air for 3 h. The SEM and TEM images of  $\beta$ -FeOOH and  $\alpha$ -Fe<sub>2</sub>O<sub>3</sub> nanorods are shown in Figure S11.

##### **Characterization**

The phase and morphology of the products were characterized by X-ray diffraction (XRD, Philips, X'pert PRO) with Cu K $\alpha$  radiation ( $\lambda = 1.54056 \text{ \AA}$ ), scanning electron microscopy (SEM, LEO 1530), and high-resolution transmission electron microscopy (HRTEM, JEOL JEM-2100). Energy dispersive X-ray (EDX) analyses were obtained using a FEI Tecnai F30 HRTEM. The samples were prepared by dropping ethanol dispersion of samples onto carbon-coated copper TEM grids. High-resolution X-ray photoelectron spectroscopy (XPS) was carried out on a PHI Quantum 2000 ESCA system with monochromatic Al K $\alpha$  radiation. BET-surface area of catalysts was measured by N<sub>2</sub> adsorption using the single point method. [The amount of Cu in  \$\alpha\$ -Fe<sub>2</sub>O<sub>3</sub> concave nanocubes was measured by inductively coupled plasma spectrometry \(ICP-MS, Agilent 7500ce\).](#)

##### **Catalytic activity measurements**

The catalytic activities of different catalysts for CO oxidation were evaluated in a fixed bed quartz tubular reactor. The catalysts (100 mg) were pre-treated at 350 °C for 4 h before placing in the reactor. The reactant gases (1 vol.% CO, 1 vol.% O<sub>2</sub>, balanced with nitrogen) went through the reactor at a rate of 60 mL min<sup>-1</sup>, corresponding to a gas hourly space velocity (GHSV) of 36 000 ml g<sup>-1</sup> h<sup>-1</sup>.

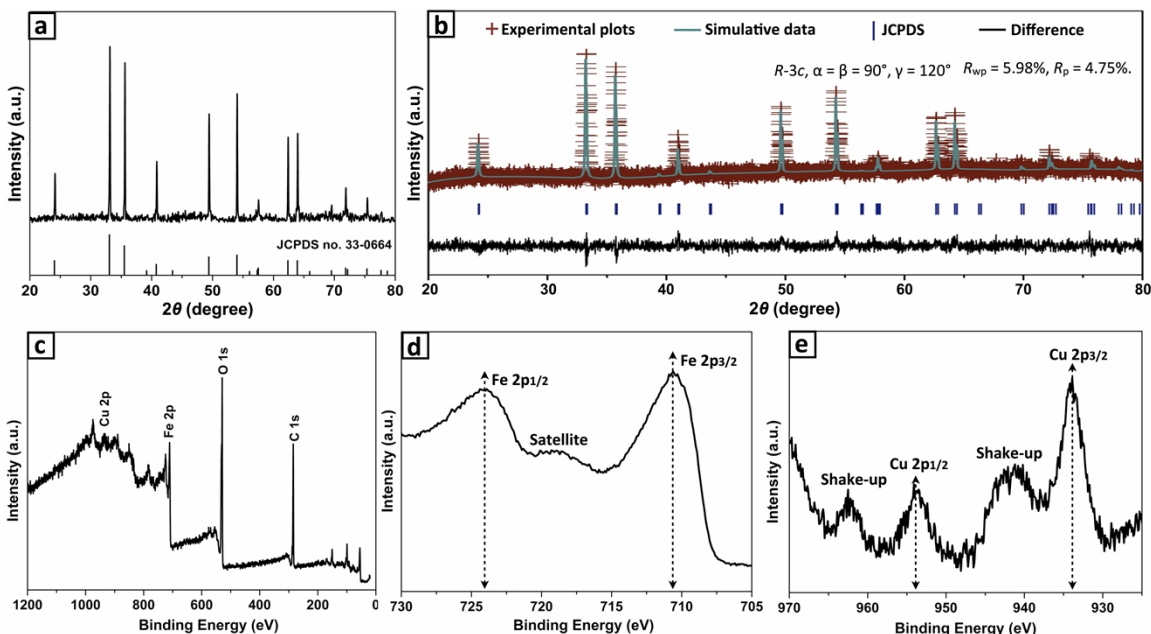

**Fig. S1** a) XRD and b) Rietveld XRD patterns of  $\alpha$ -Fe<sub>2</sub>O<sub>3</sub> concave nanocubes. c) XPS survey spectrum of  $\alpha$ -Fe<sub>2</sub>O<sub>3</sub> concave nanocubes. d) High resolution XPS spectra of Fe 2p and e) Cu 2p regions for  $\alpha$ -Fe<sub>2</sub>O<sub>3</sub> concave nanocubes. The XPS analysis shows the evidence of the presence of  $\alpha$ -Fe<sub>2</sub>O<sub>3</sub> since a satellite peak was observed between Fe 2p<sub>3/2</sub> and Fe 2p<sub>1/2</sub> peaks, which is the characteristic of  $\alpha$ -Fe<sub>2</sub>O<sub>3</sub>. The characteristic peaks of Cu 2p at 934.1 eV (Cu 2p<sub>3/2</sub>) and 953.8 eV (Cu 2p<sub>1/2</sub>) and their corresponding satellite peaks around 942.4 eV and 962.4 eV clearly indicate the presence of Cu<sup>2+</sup> ions on the surface of the concave nanocubes.

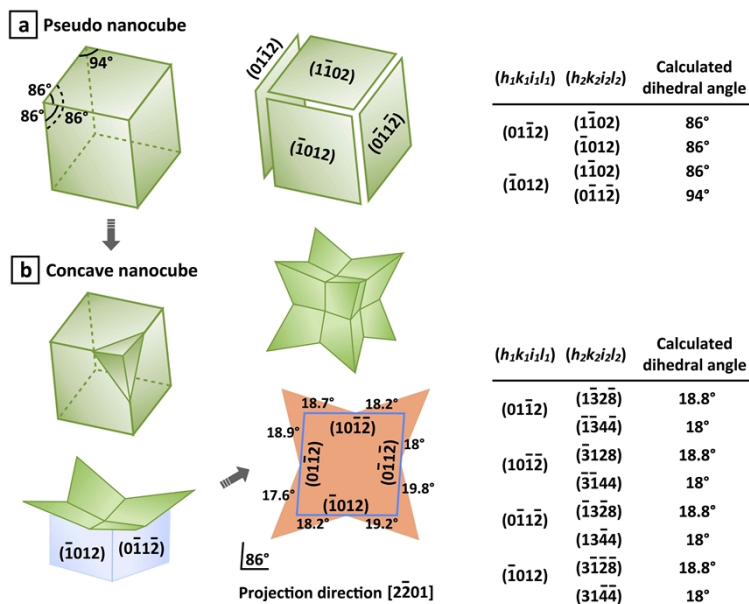

**Fig. S2** Geometrical models of  $\alpha$ -Fe<sub>2</sub>O<sub>3</sub> a) nanocubes and b) concave nanocubes, and their calculated dihedral angles.

The calculation of dihedral angles was based on the experiment results and the theoretical formula as

following:

- the concave nanocubes were evolved from pseudocubic  $\alpha\text{-Fe}_2\text{O}_3$  nanocrystals (see the structural evolution presented in Figure 3);
- the nanocubes were bound by six  $\{01\text{-}12\}$  facets as shown in Figure S2a and Figure S7;<sup>[2]</sup>
- the angles between two crystal facets can be calculated by their Miller indices by the following formula:

$$\cos \phi = \frac{h_1 h_2 + k_1 k_2 + \frac{1}{2}(h_1 k_1 + h_2 k_2) \frac{3a^2}{4c^2} l_1 l_2}{\sqrt{(h_1^2 + k_1^2 + h_1 k_1 + \frac{3a^2}{4c^2} l_1^2)(h_2^2 + k_2^2 + h_2 k_2 + \frac{3a^2}{4c^2} l_2^2)}} \quad (1)$$

According to equation (1), the Miller indices can be determined from the projection angles when the concave nanocubes are viewed along a certain crystallographic direction.

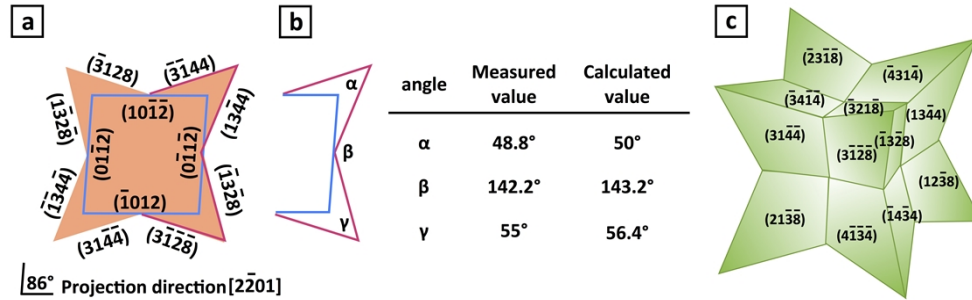

**Fig. S3** According to the apex angle of the trigonal pyramidal arms, we can also infer that the exposed facets of the trigonal pyramidal arms are  $\{13\text{-}44\}$  and  $\{12\text{-}38\}$  facets. The detailed structural models for the as-obtained concave  $\alpha\text{-Fe}_2\text{O}_3$  nanocrystals are as follows: a) a 2D model of the concave nanocrystals viewed along the direction  $[2\text{-}201]$ . The 8 edge-on facets out of 24 facets of a concave nanocube can be indexed as 4  $\{13\text{-}44\}$  and  $\{12\text{-}38\}$  facets; b) comparison of the measured values of angles  $\alpha$ ,  $\beta$  and  $\gamma$  and the calculated values; c) an ideal geometrical model of the concave nanocrystals bounded by 12  $\{13\text{-}44\}$  and 12  $\{12\text{-}38\}$  facets.

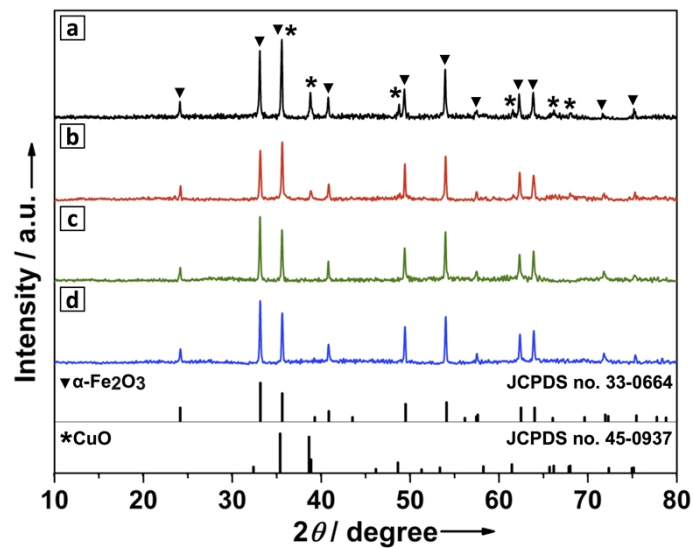

**Fig. S4** XRD patterns of the products prepared with different amount of  $\text{NH}_3 \cdot \text{H}_2\text{O}$ : a) 0.5 mL, b) 1.0 mL, c) 2.0 mL and d) 3.0 mL.

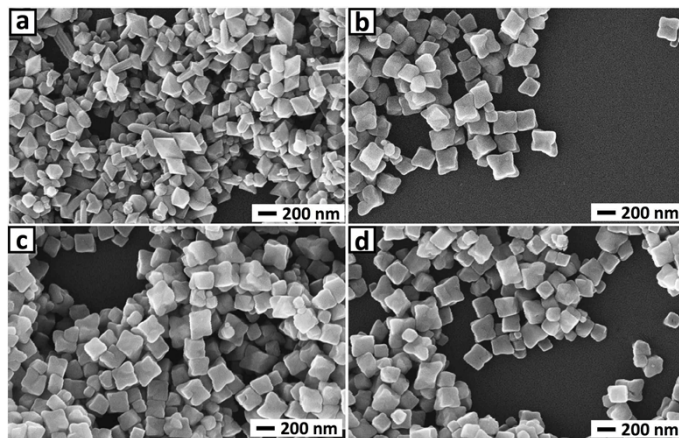

**Fig. S5** SEM images of hematite nanocrystals synthesized after hydrothermal treatment with different  $\text{Cu}^{2+}$  ion sources: a) without the addition of  $\text{Cu}^{2+}$ , b)  $\text{CuSO}_4$ , c)  $\text{Cu}(\text{NO}_3)_2$  and d)  $\text{CuCl}_2$ .

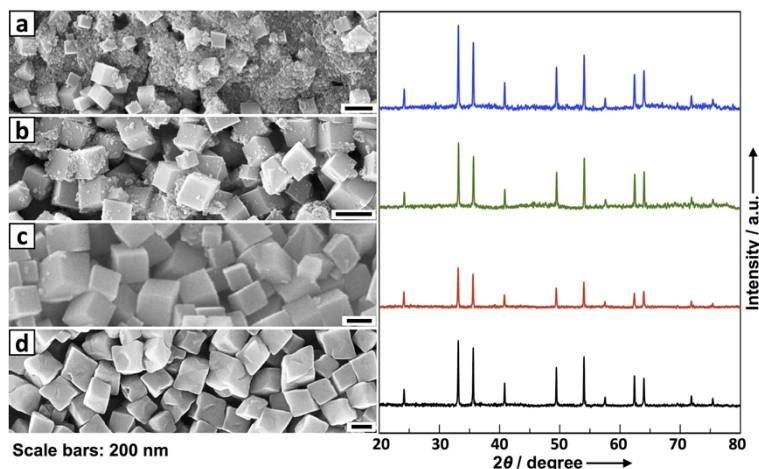

**Fig. S6** SEM images and XRD patterns of  $\alpha$ -Fe<sub>2</sub>O<sub>3</sub> nanocrystals collected after a) 1 h, b) 2 h, c) 6 h, and d) 10 h of hydrothermal treatment. For the SEM and TEM images of the sample collected after 16 h of reaction, please see Figure 1. All the as-obtained samples are pure  $\alpha$ -Fe<sub>2</sub>O<sub>3</sub> and no other impurities can be detected from their XRD patterns.

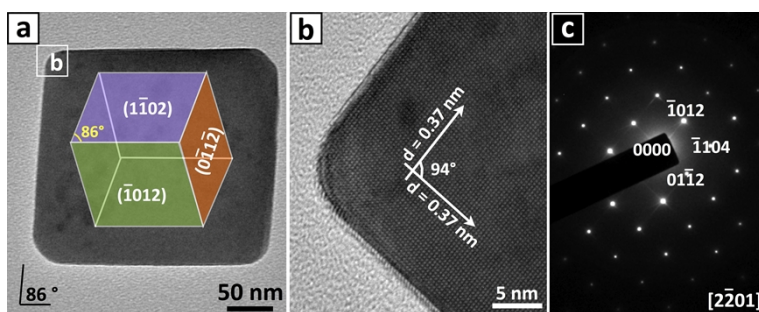

**Fig. S7** a) TEM, b) HRTEM images and c) corresponding SAED pattern of a single pseudocubic  $\alpha$ -Fe<sub>2</sub>O<sub>3</sub> nanocrystal collected after 6 h of hydrothermal treatment. From Figure S7a it can be seen that one of dihedral angles between adjacent facets is  $86^\circ$ . By comparing the measured projected angles with the calculated ones, we can infer that the pseudocubic  $\alpha$ -Fe<sub>2</sub>O<sub>3</sub> nanocrystals are enclosed by six  $\{01\bar{1}2\}$  facets, which is consistent with the results reported by Sugimoto et al. in previous work.<sup>[2]</sup>

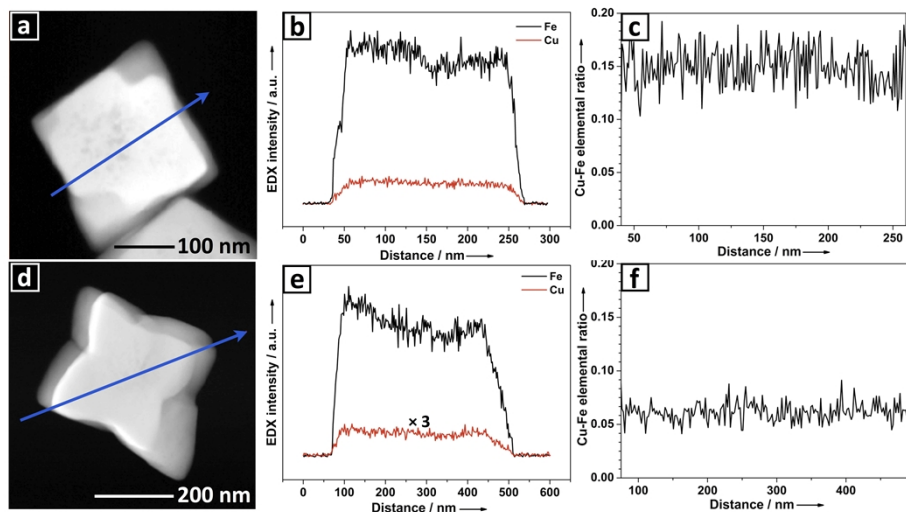

**Fig. S8** EDX line profiles of the  $\alpha$ -Fe<sub>2</sub>O<sub>3</sub> concave nanocubes obtained after different reaction time: a-c) 10 h and d-f) 16 h. The Cu-Fe elemental ratio of the product obtained after 10 h is obviously higher than that of the product obtained after 16 h, suggesting the copper ions dissolve into the bulk solution during the reaction.

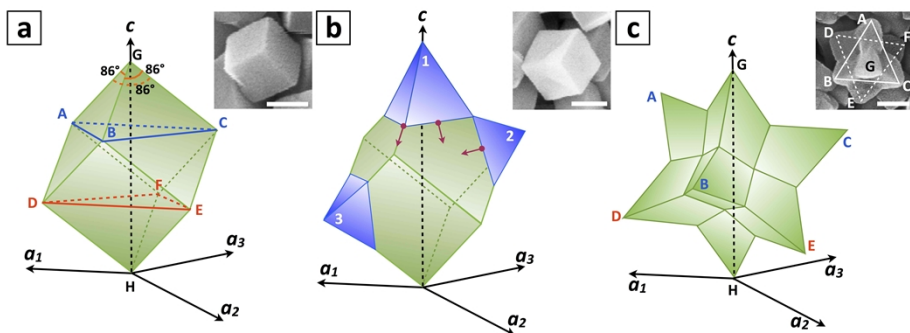

**Fig. S9** An overview of a concave hematite nanocube evolved from a pseudocubic nanocrystal set in the hexagonal coordinate. a) 6 h, b) 10 h and c) 16 h. Scale bars: 200 nm. The  $c$ -axis of the hexagonal system coincides with the longest diagonal axis (denoted as HG in Figure S9a) of a particle. The growth rate along this direction should be the fastest, and the growth rate along other directions (e.g. directions along six corners marked as A-F) should be theoretically equivalent to each other. The red arrows in Figure S9b show the growth directions of the triangular pyramids.



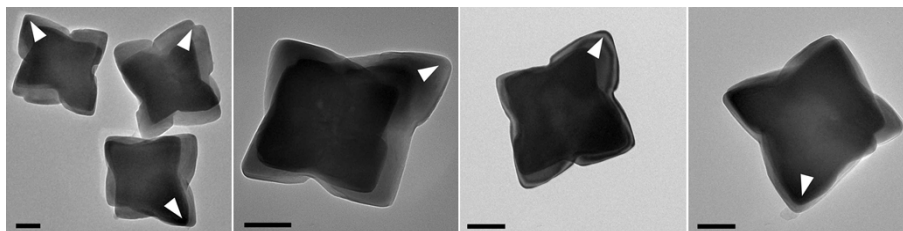

**Fig. S10** TEM images of  $\alpha$ -Fe<sub>2</sub>O<sub>3</sub> concave nanocubes. The white arrows show the direction of *c*-axis of particles, along which the growth rate is obviously much faster than other directions. Scale bars: 100 nm.

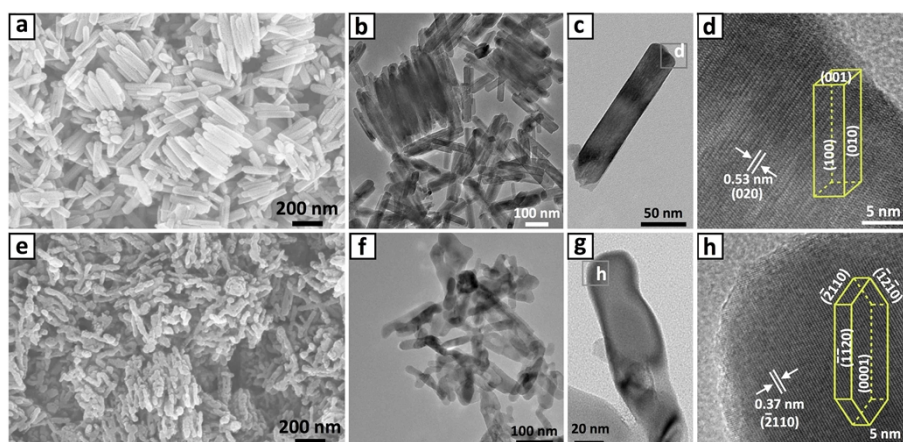

**Fig. S11** a) SEM, b, c) TEM, and d) HRTEM images of  $\beta$ -FeOOH nanorods. e) SEM, f, g) TEM, and h) HRTEM images of porous  $\alpha$ -Fe<sub>2</sub>O<sub>3</sub> nanorods obtained by calcining the  $\beta$ -FeOOH nanorods at 520 °C in air for 3 h. The insets of d) and e) are structural models of  $\beta$ -FeOOH and  $\alpha$ -Fe<sub>2</sub>O<sub>3</sub> nanorods, respectively.

**Table S1.** The specific surface areas and pore parameters of  $\alpha$ -Fe<sub>2</sub>O<sub>3</sub> concave nanocubes and porous nanorods.

| $\alpha$ -Fe <sub>2</sub> O <sub>3</sub> | BET surface area (m <sup>2</sup> g <sup>-1</sup> ) | BJH pore size (nm) | Pore volume (cm <sup>3</sup> g <sup>-1</sup> ) |
|------------------------------------------|----------------------------------------------------|--------------------|------------------------------------------------|
| Concave nanocubes                        | 13.48                                              | 3.86               | 0.03                                           |
| Porous nanorods                          | 39.26                                              | 6.15               | 0.15                                           |

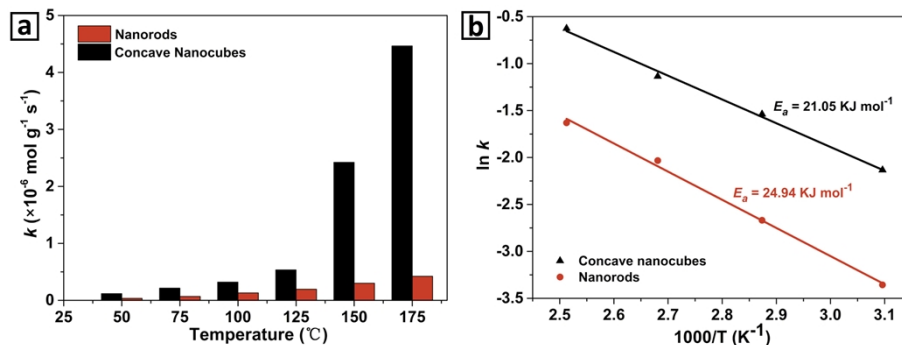

**Fig. S12** a)\* Specific rates ( $k$ ) of  $\alpha\text{-Fe}_2\text{O}_3$  concave nanocubes and nanorods in CO oxidation. b)\*\* The Arrhenius plots for the reaction activation energy  $E_a$  on  $\alpha\text{-Fe}_2\text{O}_3$  concave nanocubes and nanorods. Feed gas containing 1 vol.% CO, 1 vol.%  $\text{O}_2$  and balance  $\text{N}_2$  is at a total flow rate of  $60 \text{ mL min}^{-1}$ , corresponding to a GHSV of  $36\,000 \text{ ml g}^{-1} \text{ h}^{-1}$ .

\* The values of specific rate of CO oxidation over  $\alpha\text{-Fe}_2\text{O}_3$  concave nanocubes and porous nanorods are listed in Table S2.

The specific reaction rate  $K$  can be calculated assuming the ideal gas behaviour as follows:

$$K (\text{mol g}^{-1} \text{ s}^{-1}) = \text{GHSV} (\text{mL h}^{-1} \text{ g}^{-1}) \times 1/3600 (\text{h s}^{-1}) \times 1/1000 (\text{L mL}^{-1}) \times \text{CO vol.\%} \times \text{conversion\%} \times 1/22.4 (\text{mol L}^{-1}) \quad (2)$$

\*\*The specific reaction rate could be expressed by the Arrhenius equation:

$$K = A \exp(-E_a/RT) \quad (3)$$

where  $K$  is the reaction rate of CO ( $\text{mol CO g}^{-1} \text{ s}^{-1}$ ),  $A$  is the pre-exponential factor ( $\text{s}^{-1}$ ),  $E_a$  is the apparent activation energy ( $\text{KJ mol}^{-1}$ ),  $R$  is the gas constant, and  $T$  is the absolute temperature (K). Taking the natural log of both sides of the equation (2), we get:

$$\ln K = -E_a/T + \ln A \quad (4)$$

By plotting  $\ln K$  versus  $1000/T$ , the apparent activation energy  $E_a$  can be calculated from the slope as shown in Figure S12b.

**Table S2.** The values of specific rate of CO oxidation over  $\alpha\text{-Fe}_2\text{O}_3$  concave nanocubes and porous nanorods at different reaction temperature.

| Temperature<br>( $^{\circ}\text{C}$ ) | CO conversion (%) |                 | Specific rate ( $\times 10^{-6} \text{ mol g}^{-1} \text{ s}^{-1}$ ) |                 |
|---------------------------------------|-------------------|-----------------|----------------------------------------------------------------------|-----------------|
|                                       | Concave nanocubes | Porous nanorods | Concave nanocubes                                                    | Porous nanorods |
| 40                                    | 2.65              | 0.78            | 0.12                                                                 | 0.03            |
| 60                                    | 4.81              | 1.55            | 0.21                                                                 | 0.07            |
| 80                                    | 7.19              | 2.93            | 0.32                                                                 | 0.13            |
| 100                                   | 11.98             | 4.38            | 0.53                                                                 | 0.20            |
| 120                                   | 44.24             | 5.74            | 1.98                                                                 | 0.26            |
| 140                                   | 83.26             | 7.49            | 3.72                                                                 | 0.33            |
| 160                                   | 100               | 10.79           | 4.46                                                                 | 0.48            |



**Table S3.** A comparison of the catalytic performance towards CO oxidation over different catalysts.

| Catalyst                                                          | GHSV<br>(mL h <sup>-1</sup> g <sup>-1</sup> ) | Temp.<br>(°C) | CO<br>conversion | Specific rate<br>(× 10 <sup>-6</sup> mol g <sup>-1</sup> s <sup>-1</sup> ) | T50%<br>(°C) | T100%<br>(°C) | Ref.      |
|-------------------------------------------------------------------|-----------------------------------------------|---------------|------------------|----------------------------------------------------------------------------|--------------|---------------|-----------|
| α-Fe <sub>2</sub> O <sub>3</sub> concave nanocubes                | 36 000                                        | 120           | 44.2%            | 1.98                                                                       | 124          | 160           | This work |
| α-Fe <sub>2</sub> O <sub>3</sub> nanorods                         | 36 000                                        | 120           | 5.74%            | 0.26                                                                       | 251          | 340           | This work |
| α-Fe <sub>2</sub> O <sub>3</sub> large nanocubes <sup>[a]</sup>   | 30 000                                        | 150           | < 3%             | < 0.11                                                                     | 470          |               | [3]       |
| α-Fe <sub>2</sub> O <sub>3</sub> small nanocubes <sup>[a]</sup>   | 30 000                                        | 150           | < 3%             | < 0.11                                                                     | 266          | 350           | [3]       |
| Mesoporous CeO <sub>2</sub> <sup>[b]</sup>                        | 44 400                                        | 150           | 20%              | 3.33                                                                       | 203          | > 300         | [4]       |
| CeO <sub>2</sub> nanorods <sup>[c]</sup>                          | 30 000                                        | 150           | < 20%            |                                                                            | 186          | 275           | [5]       |
| CeO <sub>2</sub> -TiO <sub>2</sub> <sup>[d]</sup>                 | 39 000                                        | 225           | 10%              | 0.48                                                                       | 287          | > 375         | [6]       |
| Ce <sub>0.5</sub> Fe <sub>0.5</sub> O <sub>2</sub> <sup>[e]</sup> | 30 000                                        | 182           | 10%              | 0.37                                                                       | 247          | 300           | [7]       |
| α-Fe <sub>2</sub> O <sub>3</sub> /CeO <sub>2</sub> <sup>[f]</sup> | 24 000                                        | 250           | > 80%            | > 1.8                                                                      | 227          | 400           | [8]       |
| Au/CeO <sub>2</sub> <sup>[g]</sup>                                | 12 000                                        | 150           | < 40%            |                                                                            | 175          | 400           | [9]       |
| Pd/α-Fe <sub>2</sub> O <sub>3</sub>                               | 72 000                                        | 150           | < 10%            |                                                                            | 175          | 200           | [10]      |
| Au/α-Fe <sub>2</sub> O <sub>3</sub> <sup>[h]</sup>                | 80 000                                        | 150           | 70%              |                                                                            | 93           | 220           | [11]      |

[a] The catalyst was pre-treated at 350 °C for 4 h.

[b] The catalyst was pre-treated at 400 °C for 1 h.

[c] The catalyst was pre-treated at 350 °C for 4 h.

[d] The Ce/Ti mole ratio is 0.40. The catalyst was pre-treated at 500 °C for 2 h.

[e] The catalysts were pre-treated at 600 °C for 4 h in air.

[f] The catalyst was pre-treated at 650 °C for 8 h in air. The Fe molar percentage is 10%.

[g] The support was CeO<sub>2</sub> mesoporous spheres. The catalyst was pre-treated at 350 °C for 1 h.

[h] The support was rhombohedral Fe<sub>2</sub>O<sub>3</sub> nanoparticles. The Au loading is 1 wt.%.

For all catalysts, the CO concentration in the fed gas is 1 vol.%.

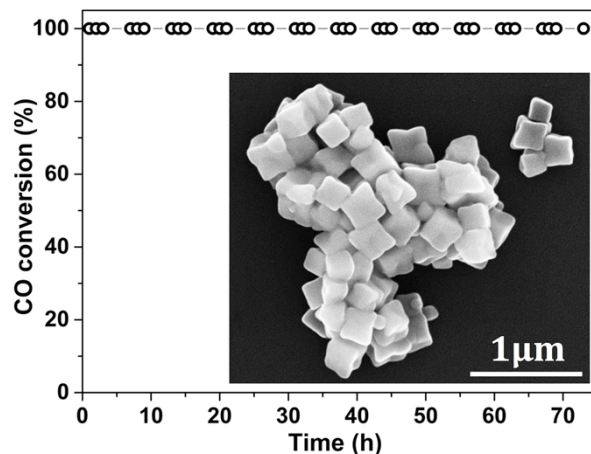

**Fig. S13** Stability test of the catalytic CO oxidation over  $\alpha$ -Fe<sub>2</sub>O<sub>3</sub> concave nanocubes at 160 °C. Feed gas containing 1 vol.% CO, 1 vol.% O<sub>2</sub> and balance N<sub>2</sub> is at a total flow rate of 60 mL min<sup>-1</sup>, corresponding to a GHSV of 36 000 ml g<sup>-1</sup> h<sup>-1</sup>. The inset shows the SEM image of the  $\alpha$ -Fe<sub>2</sub>O<sub>3</sub> concave nanocubes after 72 h of reaction.

#### References:

- [1] X. L. Fang, Y. Li, C. Chen, Q. Kuang, X. Z. Gao, Z. X. Xie, S. Y. Xie, R. B. Huang and L. S. Zhang, *Langmuir*, 2010, **26**, 2745.
- [2] G. S. Park, D. Shindo, Y. Waseda and T. Sugimoto, *J. Colloid Interface Sci.*, 1996, **177**, 198.
- [3] X. Liu, J. Liu, Z. Chang, X. Sun and Y. Li, *Catal. Commun.*, 2011, **12**, 530.
- [4] Y. Ren, Z. Ma, L. Qian, S. Dai, H. He and P. G. Bruce, *Catal. Lett.*, 2009, **131**, 146.
- [5] K. Zhou, X. Wang, X. Sun, Q. Peng and Y. Li, *J. Catal.*, 2005, **229**, 206.
- [6] H. Zhu, Z. Qin, W. Shan, W. Shen and J. Wang, *Catal. Today*, 2007, **126**, 382.
- [7] D. Qiao, G. Lu, X. Liu, Y. Guo, Y. Wang and Y. Guo, *J. Mater. Sci.*, 2011, **46**, 3500.
- [8] H. Bao, X. Chen, J. Fang, Z. Jiang and W. Huang, *Catal. Lett.*, 2008, **125**, 160.
- [9] Y. Jiao, F. Wang, X. Ma, Q. Tang, K. Wang, Y. Guo and L. Yang, *Microporous Mesoporous Mater.*, 2013, **176**, 1.
- [10] X. C. Jiang and A. B. Yu, *J. Mater. Process. Technol.*, 2009, **209**, 4558.
- [11] G. H. Wang, W. C. Li, K. M. Jia, B. Spliethoff, F. Schuth and A. H. Lu, *Appl. Catal. A*, 2009, **364**, 42.
